# Supplementary material for: Short-Term Outcome of Inpatient Treatment for Adolescents with Anorexia Nervosa Using DSM-5 Remission Criteria
Source: J Clin Med. 2021 Jul 20;10(14):3190. doi: 10.3390/jcm10143190 (PMC8307185; doi:10.3390/jcm10143190)
Supplement: Supplementary file 1 [file jcm-10-03190-s001.zip › jcm-1293585-supplementary.pdf]

**Table S1. Description of the treatment phases of the Viennese Treatment-Concept for Adolescents Suffering from Anorexia Nervosa (ViTAA)**

| Phase                                                                                                         | Description / Goals                                                                                                                                                                                                                                                                                                                                                                                                                                                                                                                                                                                                                                                                                                                                                                                                                                                        |
|---------------------------------------------------------------------------------------------------------------|----------------------------------------------------------------------------------------------------------------------------------------------------------------------------------------------------------------------------------------------------------------------------------------------------------------------------------------------------------------------------------------------------------------------------------------------------------------------------------------------------------------------------------------------------------------------------------------------------------------------------------------------------------------------------------------------------------------------------------------------------------------------------------------------------------------------------------------------------------------------------|
| 1. Orientation phase (first week)                                                                             | <p>This phase includes somatic clarification, diagnostic and treatment planning by a multi-professional team including</p> <ul style="list-style-type: none"> <li>- full spectrum of clinical and apparatus based diagnostic procedures like cranial magnetic resonance imaging (cMRI), electroencephalo-graphy (EEG), detailed laboratory diagnostic, electrocardiogram (ECG), cardiac ultrasound, bone-densitometry, height and weight assessment and further somatic clarification in collaboration with pediatrics if necessary,</li> <li>- detailed psychological diagnostic, physiotherapeutic and occupational therapeutic diagnostic</li> <li>- further diagnostic examinations if required (e.g.. logopaedic diagnostic, family interaction diagnostic).</li> </ul> <p>In this phase food and fluid in-take of the patient in own responsibility is observed.</p> |
| 2. Learning phase A ('Building-up')                                                                           | <p>This phase is characterized by a focus on weight gain as well as regaining autonomy over food preparation and consumption. Nutritional rehabilitation takes place under provision of supervised meals through specially trained nurses and is individually adapted in consultation with clinical nutritionist. Furthermore, medication with food supplements is administered and psychotropic drugs are considered depending on the eating disorder severity and treatment course as well as existing comorbidities.</p>                                                                                                                                                                                                                                                                                                                                                |
| 3. Learning phase B ('Implementing')                                                                          | <p>This phase is characterized by gradual promotion of personal responsibility regarding food and fluid intake with increasing focus on main psychological symptoms.</p>                                                                                                                                                                                                                                                                                                                                                                                                                                                                                                                                                                                                                                                                                                   |
| 4. Learning phase C ('Stabilizing')                                                                           | <p>In this phase, the patients should reach and hold their discharge weight with emphasis on outdoor orientation and reintegration. Regular discharge takes place when the discharge weight is reached, which is determined in the course of treatment on the basis of individual age- and sex-dependent BMI-percentile curves, taking into account the individual growth and weight trajectory since birth.</p>                                                                                                                                                                                                                                                                                                                                                                                                                                                           |
| 5. Intensive Phase<br><br>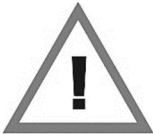 | <p>This phase describes the procedure in case of vital-threat because of malnutrition and associated somatic complications like severe bradycardia, pericardial effusion, electrolyte abnormalities, hypotension, edema, dehydration, hypothermia, hypoproteinemia risk of developing a refeeding syndrome. Depending on the severity of somatic complications constant medical observation including monitoring of the vital parameters, infusion therapy, naso-gastric tube feeding, continuous labor controls and additional examinations are carried out. If serious life-threatening somatic complications obscure patients are transferred to a pediatric ward until the stabilization of the somatic condition is reached.</p>                                                                                                                                      |

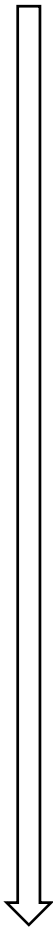

**Table S2. Bivariate correlations between eating disorder outcome instruments (total scores) at admission and discharge**

| <i>Admission</i>   |                  |                    |                    |
|--------------------|------------------|--------------------|--------------------|
|                    | <b>EDE total</b> | <b>EDE-Q total</b> | <b>EDI-2 total</b> |
| <b>EDE total</b>   | -                |                    |                    |
| <b>EDE-Q total</b> | .791***          | -                  |                    |
| <b>EDI-2 total</b> | .716***          | .710***            | -                  |
| <i>Discharge</i>   |                  |                    |                    |
|                    | <b>EDE total</b> | <b>EDE-Q total</b> | <b>EDI-2 total</b> |
| <b>EDE total</b>   | -                |                    |                    |
| <b>EDE-Q total</b> | .765***          | -                  |                    |
| <b>EDI-2 total</b> | .621***          | .708***            | -                  |

Abbreviations: EDE Eating Disorder Examination Interview, EDE-Q Eating Disorder Examination Questionnaire, EDI-2 Eating Disorder Inventory-2; \*\*\*  $p < .001$

**Figure S1. Bivariate correlations between EDE, EDE-Q and EDI-2 total and subscores at admission**

|                |          |          |          |          |          |          |          |          |          |          |          |          |         |          |          |          |          |          |         |          |          |          |
|----------------|----------|----------|----------|----------|----------|----------|----------|----------|----------|----------|----------|----------|---------|----------|----------|----------|----------|----------|---------|----------|----------|----------|
| ede.tot0       |          | 0.848*** | 0.852*** | 0.905*** | 0.939*** | 0.791*** | 0.668*** | 0.726*** | 0.738*** | 0.751*** | 0.716*** | 0.768*** | 0.189   | 0.674*** | 0.485*** | 0.291**  | 0.24*    | 0.527*** | 0.198*  | 0.548*** | 0.358*** | 0.345*** |
| ede.rs0        | 0.848*** |          | 0.624*** | 0.643*** | 0.722*** | 0.753*** | 0.719*** | 0.641*** | 0.656*** | 0.708*** | 0.594*** | 0.715*** | 0.141   | 0.576*** | 0.404*** | 0.194*   | 0.139    | 0.463*** | 0.195*  | 0.479*** | 0.204*   | 0.242*   |
| ede.ec0        | 0.852*** | 0.624*** |          | 0.685*** | 0.74***  | 0.837*** | 0.536*** | 0.684*** | 0.535*** | 0.591*** | 0.611*** | 0.561*** | 0.289** | 0.488*** | 0.427*** | 0.319**  | 0.281**  | 0.482*** | 0.187   | 0.489*** | 0.296**  | 0.282**  |
| ede.wc0        | 0.905*** | 0.643*** | 0.685*** |          | 0.872*** | 0.66***  | 0.49***  | 0.61***  | 0.702*** | 0.619*** | 0.63***  | 0.707*** | 0.072   | 0.672*** | 0.381*** | 0.227*   | 0.18     | 0.425*** | 0.183   | 0.448*** | 0.372*** | 0.309**  |
| ede.sc0        | 0.939*** | 0.722*** | 0.74***  | 0.872*** |          | 0.755*** | 0.618*** | 0.688*** | 0.72***  | 0.747*** | 0.721*** | 0.746*** | 0.187   | 0.66***  | 0.521*** | 0.306**  | 0.267**  | 0.515*** | 0.142   | 0.544*** | 0.404*** | 0.398*** |
| edeq.tot0      | 0.791*** | 0.753*** | 0.637*** | 0.66***  | 0.755*** |          | 0.893*** | 0.883*** | 0.906*** | 0.955*** | 0.71***  | 0.784*** | 0.175   | 0.653*** | 0.497*** | 0.389*** | 0.248*   | 0.531*** | 0.163   | 0.552*** | 0.393*** | 0.246*   |
| edeq.rs0       | 0.668*** | 0.719*** | 0.536*** | 0.49***  | 0.618*** | 0.893*** |          | 0.708*** | 0.692*** | 0.802*** | 0.59***  | 0.859*** | 0.245*  | 0.491*** | 0.387*** | 0.353*** | 0.221*   | 0.489*** | 0.11    | 0.466*** | 0.309**  | 0.175    |
| edeq.ec0       | 0.726*** | 0.641*** | 0.664*** | 0.61***  | 0.668*** | 0.883*** | 0.708*** |          | 0.749*** | 0.797*** | 0.635*** | 0.617*** | 0.142   | 0.545*** | 0.472*** | 0.325**  | 0.222*   | 0.508*** | 0.159   | 0.539*** | 0.394*** | 0.249*   |
| edeq.wc0       | 0.738*** | 0.656*** | 0.535*** | 0.702*** | 0.72***  | 0.906*** | 0.692*** | 0.749*** |          | 0.871*** | 0.657*** | 0.757*** | 0.076   | 0.674*** | 0.416*** | 0.364*** | 0.224*   | 0.445*** | 0.139   | 0.469*** | 0.376*** | 0.248*   |
| edeq.sc0       | 0.751*** | 0.708*** | 0.591*** | 0.619*** | 0.747*** | 0.955*** | 0.802*** | 0.797*** | 0.871*** |          | 0.701*** | 0.739*** | 0.156   | 0.674*** | 0.54***  | 0.37***  | 0.232*   | 0.487*** | 0.189   | 0.538*** | 0.363*** | 0.234*   |
| edi.tot0       | 0.716*** | 0.594*** | 0.611*** | 0.63***  | 0.721*** | 0.71***  | 0.59***  | 0.835*** | 0.657*** | 0.701*** |          | 0.792*** | 0.198*  | 0.736*** | 0.799*** | 0.497*** | 0.579*** | 0.795*** | 0.285** | 0.833*** | 0.605*** | 0.584*** |
| edi.dt0        | 0.768*** | 0.716*** | 0.561*** | 0.707*** | 0.746*** | 0.764*** | 0.659*** | 0.617*** | 0.757*** | 0.739*** | 0.792*** |          | 0.109   | 0.77***  | 0.467*** | 0.337*** | 0.293**  | 0.545*** | 0.212*  | 0.602*** | 0.328*** | 0.331*** |
| edi.bulim0     | 0.189    | 0.141    | 0.289**  | 0.072    | 0.187    | 0.175    | 0.245*   | 0.142    | 0.076    | 0.156    | 0.198*   | 0.109    |         | 0.058    | 0.061    | 0.236*   | -0.009   | 0.271**  | -0.136  | 0.115    | 0.185    | 0.054    |
| edi.bd0        | 0.674*** | 0.576*** | 0.488*** | 0.672*** | 0.66***  | 0.653*** | 0.491*** | 0.545*** | 0.674*** | 0.674*** | 0.736*** | 0.77***  | 0.058   |          | 0.491*** | 0.218*   | 0.238*   | 0.492*** | 0.096   | 0.569*** | 0.266**  | 0.296**  |
| edi.ineffec0   | 0.485*** | 0.404*** | 0.427*** | 0.381*** | 0.521*** | 0.497*** | 0.387*** | 0.472*** | 0.416*** | 0.54***  | 0.799*** | 0.467*** | 0.061   | 0.491*** |          | 0.292**  | 0.49***  | 0.641*** | 0.201*  | 0.726*** | 0.483*** | 0.482*** |
| edi.perfec0    | 0.291**  | 0.194*   | 0.319**  | 0.227*   | 0.308**  | 0.389*** | 0.353*** | 0.325**  | 0.364*** | 0.37***  | 0.497*** | 0.337*** | 0.236*  | 0.218*   | 0.292**  |          | 0.273**  | 0.351*** | 0.009   | 0.477*** | 0.339*** | 0.145    |
| edi.id0        | 0.24*    | 0.139    | 0.281**  | 0.18     | 0.267**  | 0.248*   | 0.221*   | 0.222*   | 0.224*   | 0.232*   | 0.579*** | 0.293**  | -0.009  | 0.238*   | 0.49***  | 0.273**  |          | 0.432*** | -0.035  | 0.412*** | 0.229*   | 0.717*** |
| edi.interocep0 | 0.527*** | 0.483*** | 0.482*** | 0.425*** | 0.515*** | 0.531*** | 0.489*** | 0.508*** | 0.445*** | 0.487*** | 0.795*** | 0.545*** | 0.271** | 0.492*** | 0.641*** | 0.351*** | 0.432*** |          | 0.099   | 0.634*** | 0.541*** | 0.419*** |
| edi.mf0        | 0.198*   | 0.195*   | 0.187    | 0.183    | 0.142    | 0.163    | 0.11     | 0.159    | 0.139    | 0.189    | 0.285**  | 0.212*   | -0.136  | 0.096    | 0.201*   | 0.009    | -0.035   | 0.099    |         | 0.238*   | 0.215*   | -0.067   |
| edi.asc0       | 0.548*** | 0.479*** | 0.489*** | 0.448*** | 0.544*** | 0.552*** | 0.466*** | 0.539*** | 0.469*** | 0.538*** | 0.833*** | 0.802*** | 0.115   | 0.569*** | 0.726*** | 0.477*** | 0.412*** | 0.634*** | 0.238*  |          | 0.462*** | 0.391*** |
| edi.impuls0    | 0.358*** | 0.204*   | 0.296**  | 0.372*** | 0.404*** | 0.393*** | 0.309**  | 0.394*** | 0.376*** | 0.363*** | 0.605*** | 0.328*** | 0.185   | 0.266**  | 0.483*** | 0.339*** | 0.229*   | 0.541*** | 0.215*  | 0.462*** |          | 0.291**  |
| edi.si0        | 0.345*** | 0.242*   | 0.282**  | 0.309**  | 0.398*** | 0.246*   | 0.175    | 0.249*   | 0.248*   | 0.234*   | 0.584*** | 0.331*** | 0.054   | 0.296**  | 0.482*** | 0.145    | 0.717*** | 0.419*** | -0.067  | 0.391*** | 0.291**  |          |

Abbreviations:

|                |                                     |
|----------------|-------------------------------------|
| ede.tot0       | EDE Total score                     |
| ede.rs0        | EDE Restraint score                 |
| ede.ec0        | EDE Eating concern score            |
| ede.wc0        | EDE Weight concern score            |
| ede.sc0        | EDE Shape concern score             |
| edeq.tot0      | EDEQ Total score                    |
| edeq.rs0       | EDEQ Restraint score                |
| edeq.ec0       | EDEQ Eating concern score           |
| edeq.wc0       | EDEQ Weight concern score           |
| edeq.sc0       | EDEQ Shape concerns score           |
| edi.tot0       | EDI-2 Total score                   |
| edi.dt0        | EDI-2 Drive for thinness score      |
| edi.bulim0     | EDI-2 Bulimia score                 |
| edi.bd0        | EDI-2 Body dissatisfaction score    |
| edi.ineffec0   | EDI-2 Ineffectiveness score         |
| edi.perfec0    | EDI-2 Perfectionism score           |
| edi.id0        | EDI-2 Interpersonal Distrust Score  |
| edi.interocep0 | EDI-2 Interoceptive awareness score |
| edi.mf0        | EDI-2 Maturity fears score          |
| edi.asc0       | EDI-2 Asceticism score              |
| edi.impuls0    | EDI-2 Impulse regulation score      |
| edi.si0        | EDI-2 Social insecurity score       |

EDE Eating Disorder Examination Interview  
EDE-Q Eating Disorder Examination Questionnaire  
EDI-2 Eating Disorder Inventory-2

**Table S3. Results of univariate linear regression analyses predicting change in BMI (slopes presented only)**

| Predictor                                | <i>b</i> (SE)  | Beta   | <i>t</i> -value | <i>p</i>        |
|------------------------------------------|----------------|--------|-----------------|-----------------|
| <b><i>Sociodemographic:</i></b>          |                |        |                 |                 |
| Age at admission                         | -0.013 (0.08)  | -0.014 | -0.159          | .874            |
| Family status <sup>1</sup>               | 0.479 (0.27)   | 0.158  | 1.786           | .077            |
| <b><i>Clinical:</i></b>                  |                |        |                 |                 |
| BMI at admission                         | -0.625 (0.08)  | -0.568 | -7.690          | <b>&lt;.001</b> |
| EDE total at admission                   | 0.066 (0.09)   | 0.068  | 0.749           | .456            |
| Age of eating disorder onset             | 0.028 (0.08)   | 0.033  | 0.369           | .713            |
| Duration of illness                      | -0.012 (0.01)  | -0.083 | -0.926          | .356            |
| Weight suppression                       | 0.028 (0.02)   | 0.125  | 1.381           | .170            |
| Duration of inpatient stay               | 0.024 (< 0.01) | 0.568  | 7.620           | <b>&lt;.001</b> |
| Any psychiatric comorbidity <sup>2</sup> | -0.043 (0.27)  | -0.014 | -0.161          | .873            |
| <b><i>Psychopharmacological:</i></b>     |                |        |                 |                 |
| Antidepressant medication <sup>2</sup>   | -0.200 (0.26)  | -0.069 | -0.766          | .445            |
| Antipsychotic medication <sup>2</sup>    | 0.773 (0.26)   | 0.259  | 2.988           | <b>.003</b>     |
| Anxiolytic medication <sup>2</sup>       | 0.579 (0.32)   | 0.160  | 1.805           | .074            |

<sup>1</sup> coded as follows: 1 = single parent families, 2 = living with both biological parents; <sup>2</sup> coded as follows: 0 = no, 1 = yes;  
Abbreviations: BMI Body-Mass-Index; EDE Eating Disorder Examination Interview

**Table S4. Results of univariate linear regression analyses predicting duration of inpatient stay**

| <b>Predictor</b>                         | <b>b(SE)</b>  | <b>Beta</b> | <b>t-value</b> | <b>p</b>    |
|------------------------------------------|---------------|-------------|----------------|-------------|
| <b><i>Sociodemographic:</i></b>          |               |             |                |             |
| Age at admission                         | 1.486 (1.97)  | 0.073       | 0.754          | .453        |
| Family status <sup>1</sup>               | -0.740 (6.43) | -0.011      | -0.115         | .908        |
| <b><i>Clinical:</i></b>                  |               |             |                |             |
| BMI at admission                         | -5.079 (2.26) | -0.213      | -2.246         | <b>.027</b> |
| EDE total at admission                   | 6.276 (1.97)  | 0.299       | 3.180          | <b>.002</b> |
| Age of eating disorder onset             | 0.280 (1.78)  | 0.015       | 0.157          | .875        |
| Weight suppression                       | 0.586 (0.48)  | 0.119       | 1.217          | .226        |
| Duration of illness                      | 0.396 (0.30)  | 0.129       | 1.339          | .183        |
| Any psychiatric comorbidity <sup>2</sup> | 8.016 (6.38)  | 0.121       | 1.257          | .212        |
| <b><i>Psychopharmacological:</i></b>     |               |             |                |             |
| Antidepressant medication <sup>2</sup>   | 12.648 (6.03) | 0.200       | 2.099          | <b>.038</b> |
| Antipsychotic medication <sup>2</sup>    | 16.619 (6.18) | 0.253       | 2.690          | <b>.008</b> |
| Anxiolytic medication <sup>2</sup>       | 23.511 (7.22) | 0.302       | 3.257          | <b>.002</b> |

<sup>1</sup> coded as follows: 1 = single parent families, 2 = living with both biological parents; <sup>2</sup> coded as follows: 0 = no, 1 = yes; Abbreviations: BMI Body-Mass-Index; EDE Eating Disorder Examination Interview; Note: only cases with regular discharge and duration of inpatient stay < 300 days considered for this analysis (N = 108)
